# Supplementary material
Source: HighWire-hosted journal article supplement (doi:10.1136/ebmental-2013-101410)
Supplement: ebmental-2013-101410supp_tables.pdf [file ebmental-2013-101410supp_tables.pdf]

**Webextra table 1: Mean difference in psychosocial consequences between women with false-positive mammography screening results and those with breast cancer**

|                              | <b>Δ: Mean difference in mean scores, (95% CI), p</b> |                              |                              |
|------------------------------|-------------------------------------------------------|------------------------------|------------------------------|
| <b>COS-BC Scale</b>          | <b>0 months</b>                                       | <b>6 months</b>              | <b>36 months</b>             |
| Existential values           | NA                                                    | 1.15 (0.23 to 2.07), 0.015   | 1.43 (0.69 to 2.19), < 0.001 |
| Social network               | NA                                                    | 0.47 (0.14 to 0.81), 0.006   | 0.38 (0.10 to 0.65), 0.007   |
| Inner calm                   | NA                                                    | 0.13 (-0.19 to +0.46), 0.423 | 0.36 (0.08 to 0.64), 0.012   |
| Worried about breast cancer  | NA                                                    | NA                           | NA                           |
| Keeping mind off things      | 0.04 (-0.18 to +0.26), 0.741                          | 0.63 (0.34 to 0.92), < 0.001 | 0.35 (0.16 to 0.55), < 0.001 |
| Felt less attractive         | 0.03 (-0.10 to +0.15), 0.668                          | 0.40 (0.22 to 0.58), < 0.001 | 0.22 (0.09 to 0.35), 0.001   |
| Negative sexuality impact    | 0.29 (-0.27 to +0.84), 0.316                          | 1.29 (0.66 to 1.92), <0.001  | 0.70 (0.20 to 1.21), 0.006   |
| Breast examination           | 0.10 (-0.29 to +0.48), 0.629                          | 0.67 (0.21 to 1.14), 0.005   | 0.28 (-0.06 to 0.63), 0.106  |
| Negative Impact on sleep     | 0.08 (-0.58 to +1.44), 0.845                          | 2.12 (1.17 to 3.08), < 0.001 | 0.82 (0.08 to 1.55), 0.029   |
| Negative impact on behaviour | 0.29 (-0.61 to +1.20), 0.527                          | 2.87 (1.73 to 4.01), < 0.001 | 1.20 (0.31 to 2.08), 0.008   |
| Anxiety                      | 0.34 (-0.68 to +1.44), 0.510                          | 2.60 (1.47 to 3.72), < 0.001 | 1.33 (0.37 to 2.28), 0.007   |
| Sense of dejection           | 0.43 (-0.58 to +1.44), 0.401                          | 3.26 (2.05 to 4.47), < 0.001 | 1.49 (0.63 to 2.35), 0.001   |

**Webextra table 2: Mean difference in psychosocial consequences between women with a normal mammography screening result and those with a false positive result**

|                              | <b>Δ: Mean difference in mean scores, (95% CI), p</b> |                              |                             |
|------------------------------|-------------------------------------------------------|------------------------------|-----------------------------|
| <b>COS-BC Scale</b>          | <b>0 months</b>                                       | <b>6 months</b>              | <b>36 months</b>            |
| Existential values           | NA                                                    | 1.74 (1.04 to 2.44), < 0.001 | 0.83 (0.36 to 1.30), 0.001  |
| Social network               | NA                                                    | 0.34 (0.04 to 0.64), 0.026   | 0.20 (0.04 to 0.40), 0.016  |
| Inner calm                   | NA                                                    | 0.42 (0.13 to 0.72), 0.005   | 0.03 (-0.16 to 0.21), 0.786 |
| Worried about breast cancer  | NA                                                    | 0.61 (0.30 to 0.92), <0.001  | 0.16 (-0.03 to 0.35), 0.099 |
| Keeping mind off things      | 1.10 (0.96 to 1.25), < 0.001                          | 0.21 (0.05 to 0.37), 0.010   | 0.16 (0.04 to 0.27), 0.007  |
| Felt less attractive         | 0.17 (0.10 to 0.25), < 0.001                          | 0.08 (-0.00 to 0.16), 0.060  | 0.07 (0.01 to 0.14), 0.023  |
| Negative sexuality impact    | 0.76 (0.45 to 1.07), < 0.001                          | 0.26 (-0.09 to 0.61), 0.151  | 0.31 (-0.04 to 0.66), 0.086 |
| Breast examination           | 1.64 (1.40 to 1.88), < 0.001                          | 0.46 (0.22 to 0.69), < 0.001 | 0.38 (0.14 to 0.62), 0.002  |
| Negative Impact on sleep     | 2.81 (2.33 to 3.30), < 0.001                          | 0.65 (0.14 to 1.16), 0.013   | 0.71 (0.17 to 1.25), 0.010  |
| Negative impact on behaviour | 3.70 (3.12 to 4.28), < 0.001                          | 0.89 (0.30 to 1.49), 0.003   | 0.60 (-0.01 to 1.20), 0.054 |
| Anxiety                      | 5.83 (5.17 to 6.49), < 0.001                          | 1.08 (0.50 to 1.66), < 0.001 | 0.87 (0.17 to 1.56), 0.014  |
| Sense of dejection           | 5.91 (5.27 to 6.55), < 0.001                          | 0.83 (0.23 to 1.43), 0.007   | 0.69 (0.16 to 1.21), 0.011  |
